# Supplementary material
Source: Springer Nature journal article supplement (https://www.springermedizin.de/resource/supplementary/12957_2012_1271_MOESM1_ESM.pdf/9562876)

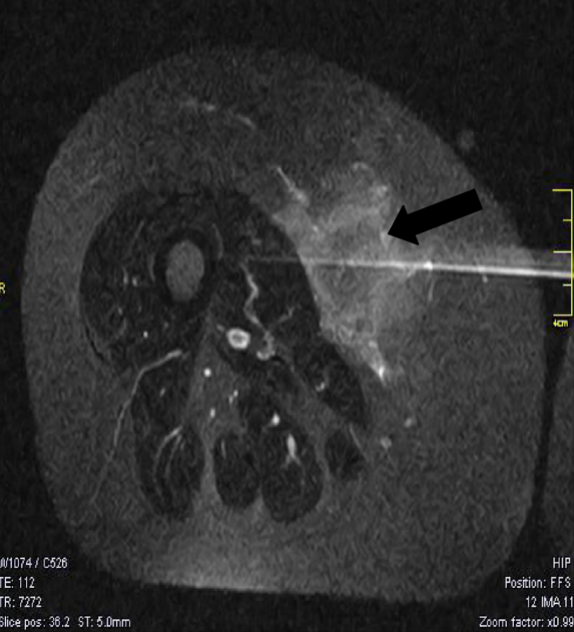

AV1074 / C526

TE: 112

TR: 7272

Slice pos: 36.2 ST: 5.0mm

HIP

Position: FFS

12 IMA 11

Zoom factor: x0.99

Supplement: MOESM1 [file 9562876]
